# Supplementary material
Source: PubMed Central journal article supplement (PMC9882430)
Supplement: NIHPP2023.01.16.23284626v1-supplement-1.pdf [file NIHPP2023.01.16.23284626v1-supplement-1.pdf]

**Supplementary Table S1: AIM antibodies used for cell staining**

|    | Membrane Antibody | Fluorochrome | Clone/vendor/catalog         |
|----|-------------------|--------------|------------------------------|
| 1  | CD45RA            | BV421        | HI100/Biolegend/304130       |
| 2  | CD14              | V500         | M5E2/BD/561391               |
| 3  | CD19              | V500         | HIB19/BD/561121              |
| 4  | Live/Dead         |              |                              |
| 5  | CD8               | BV650        | RPA-T8/BioLegend/301042      |
| 6  | CD4               | PE-CF594     | RPA-T4RUO/BD/62316           |
| 8  | CCR7              | FITC         | G043H7/Biolegend/353216      |
| 9  | CD69              | PE           | FN50/BD/555531               |
| 10 | OX40              | PE-Cy7       | Ber-ACT35/Biolegend/350012   |
| 11 | CD137             | APC          | 4B4-1/BioLegend/309810       |
| 12 | CD3               | AF700        | UCHT1/eBioscience/56-0038-42 |

medRxiv preprint doi: <https://doi.org/10.1101/2023.01.16.23284626>; this version posted January 20, 2023. The copyright holder for this preprint (which was not certified by peer review) is the author/funder, who has granted medRxiv a license to display the preprint in perpetuity. This article is a US Government work. It is not subject to copyright under 17 USC 105 and is also made available for use under a CC0 license.

**Supplementary Table S2: Hospitalized COVID + samples**

| <i>COVID cohort, n=3</i>    | CD4+ T cell Reactivity | % CD4+ Reactivity | CD8+ T cell Reactivity | % CD8 Reactivity |
|-----------------------------|------------------------|-------------------|------------------------|------------------|
| <i>CD4_Non-spike</i>        | 2                      | 66.7%             | 1                      | 33.3%            |
| <i>CD4_Spike</i>            | 2                      | 66.7%             | 2                      | 66.7%            |
| <i>CD8_A</i>                | 3                      | 100.0%            | 3                      | 100.0%           |
| <i>CD8_B</i>                | 3                      | 100.0%            | 1                      | 33.3%            |
|                             |                        |                   |                        |                  |
| <i>Total Pools Reactive</i> |                        |                   |                        |                  |
| <i>0</i>                    | 0                      | 0.0%              | 0                      | 0.0%             |
| <i>1</i>                    | 0                      | 0.0%              | 1                      | 33.3%            |
| <i>2</i>                    | 1                      | 33.3%             | 1                      | 33.3%            |
| <i>3</i>                    | 0                      | 0.0%              | 0                      | 0.0%             |
| <i>4</i>                    | 2                      | 66.7%             | 1                      | 33.3%            |

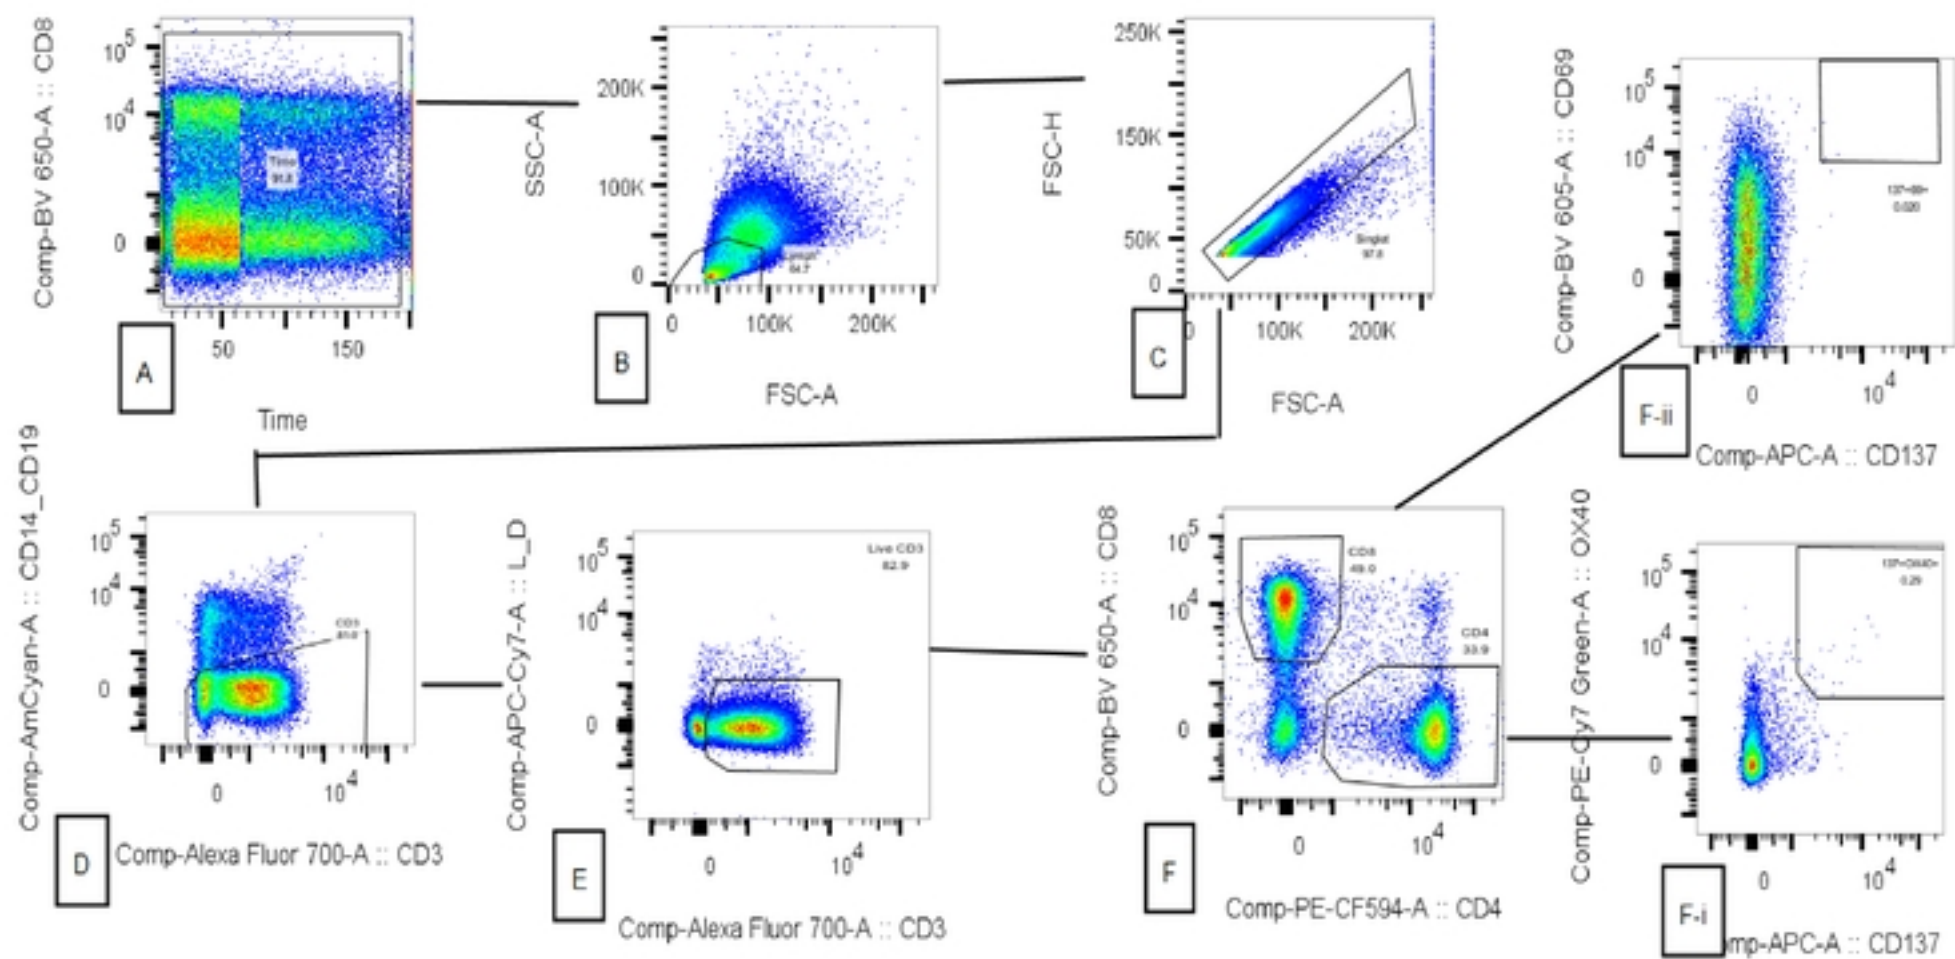

**Supplementary Figure S1: Gating strategy (A-F) for detection of SARS-CoV-2 reactive CD4+ and CD8+ cells after PBMC stimulation:** Time gating was done to eliminate any artifact like air bubble (A), followed by a selection of lymphocyte population (B), and singlets (C). Live CD3+ cells were selected (D-E), then divided into CD4+ and CD8+ cells (F). Within CD4 and CD8 subsets, antigen-specific T cells were established through the upregulation of activation-induced markers OX40, CD69, and CD137. Percentages of OX40+CD137+ double-positive cells within the CD4 gate (F-i) and percentage of CD69+CD137+ within the CD8 gate (F-ii) showing activated cells, were gated out to be used for further analysis
